# Supplementary material for: Electric stimulation-guided epidural analgesia for vaginal delivery: A randomized prospective study
Source: PLoS One. 2019 Jan 11;14(1):e0209967. doi: 10.1371/journal.pone.0209967 (PMC6329494; doi:10.1371/journal.pone.0209967)
Supplement: S5 File — (PDF) [file pone.0209967.s005.pdf]

[서식04]

|                                                                                                                                      |                                   |              |
|--------------------------------------------------------------------------------------------------------------------------------------|-----------------------------------|--------------|
| 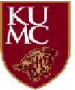 <b>고려대학교구로병원</b><br>KOREA UNIVERSITY GURO HOSPITAL | <b>Institutional Review Board</b> | <b>연구계획서</b> |
|--------------------------------------------------------------------------------------------------------------------------------------|-----------------------------------|--------------|

※다음의 항목으로 기재하시고 해당사항이 없는 항목에는 ‘해당사항 없음’으로 표시하시기 바랍니다.  
 ※하단에 연구계획서의 version을 명시해 주시기 바랍니다.

1. 임상시험의 명칭 및 단계(해당되는 경우)

자연분만 시 무통분만을 위한 경막외 마취시 기존의 저항소실법만을 이용한 경막외 마취와 저항소실법과 RegionalStim<sup>®</sup>을 이용한 경막외 마취의 효과 및 성공률에 대한 비교연구(by pilot study)

2. 임상시험 실시기관명 및 주소

고려대학교 구로병원 통증클리닉

서울특별시 구로구 구로동 80번지 고려대학교 구로병원 통증클리닉

3. 임상시험 책임연구자, 담당자, 공동연구자의 성명 및 직명

책임연구자: 최상식 (부교수)

공동연구자: 이충훈 (전공의)

공동연구자: 이미경 (교수)

공동연구자: 김정은 (임상조교수)

4. 의료기기관리자의 성명 및 직명(해당되는 경우)

책임연구자: 최상식 (부교수)

공동연구자: 이충훈 (전공의)

5. 임상시험 의뢰자명 및 주소

해당사항 없음

6. 임상시험의 배경 및 목적

1) 연구 목적

자연분만 시 무통분만을 위한 경막외 마취는 흔히 사용되는 마취방법으로 자연분만 전,후의 통증관리에 유용한 부위마취 방법입니다. 그리고 경막외 마취의 대다수의 문헌보고는 긍정적인 결과를 보였습니다.(1)하지만 경막외 마취의 실패율은 20% ~ 40%로 높이 보고되고 있는 실정입니다.(2-3) 실패의 흔한 원인은 경막외 카테터가 올바른 위치에 거치되지 못하는 것으로 기존에 거치 방법으로 사용하고 있는 loss of resistance(LOR) 으로는 올바른 카테터 위치를 보장하지 못하는 것이 사실입니다. 이에 본 연구는 blind로 기존의 LOR을 이용한 경막외 마취와 RegionalStim을 이용하여 전기자극을 통해 카테터 위치를 확인하는 두가지 방법을 비교 연구하여 성공률을 비교해 볼 것이며 올바르게 카테터가 위치 해 있는 경우에 한하여 경막외 마취의 적절성 및 자연분만 전,후에 적절한 통증 조절이 되었는지에 대하여 연구할 계획입니다.

2) 국내외 연구 현황 및 해당 연구와 관련된 선행 연구 결과

1. 소아에서 caudal epidural block 시 전기자극을 주어 위치를 확인하는 임상시험이 있으며

predictive value가 100%로 맹목적으로 시행한 것보다 높게 나온 연구가 있습니다.(4)

2. 경막외 카테터 거치시 신경자극기를 이용한 연구가 있습니다. 이 역시 민감도, 특이도가 기존 방법보다 높게 나타났습니다.(5)

3) 임상시험의 경우 선행단계 임상시험의 성적(임상례수-계획된 수, 실제 대상 수, 완료된 수, 중도 탈락자 수 및 이유, 부작용 등에 대한 사항 포함)

1번 항목에서 언급하였습니다.

7. 의료기기의 상품명(또는 주성분의 일반명), 원자재 및 그 분량, 형상 등(해당되는 경우)

RegionalStim<sup>®</sup> (Neuroplasty Cathter Set)

8. 대상질환(적응증)

무통분만을 원하는 자연분만 산모

9. 피험자의 선정기준, 제외기준

1) 선정기준

① 무통분만을 원하는 자연분만 산모

① 서면동의서를 제출한 산모

2) 제외기준

① 시험 결과의 해석, 안전성, 피험자 참여에 영향을 줄 수 있는 암 또는 신경학적, 정신과적, 심장, 간, 혈액학적, 근육, 피부, 생식기, 면역결핍 장애의 병력이 있거나 현재 있는 경우

① 경막외 마취를 시행해야 하는 부위의 피부질환이 있는 경우

① 최근에 중요한 의학적 처치/수술을 받았던 과거력이 있는 경우

① 척추수술로 인해 경막외 공간에서의 카테터 진행이나 거치가 어려운 경우

① 혈액응고장애가 있거나 항응고제 치료를 받고 있는 경우

① 신경병증성 통증으로 인해 의료기기를 적용중인 환자 (spinal cord stimulator, intrathecal pump 또는 peripheral nerve stimulator)

① 기타, 연구자가 임상시험 참여에 부적합하다고 판단한 경우

10. 목표 피험자의 수 및 산출 근거

경막외마취(저항소실법 만을 이용한 방법)에 대한 성공률 및 분만 후 통증 조절에 대한 reference는 현재 보고되어 있으나 이 성공률 및 분만 후 통증 조절 정도는 시행하는 의사의 숙련도에 의해 크게 차이가 난다고 생각했습니다. 그래서 본 저자들은 마취통증의학과 전공의 2년차, 3년차 각각 두 명이 시행하는 경막외 마취(저항소실법 만을 이용한 방법)과 저항소실법에 RegionalStim 방법을 추가한 경막외 마취의 성공률 및 분만 후 통증 조절 정도에 대해 우선 pilot study를 통해 비교연구하기로 하였고 Pilot study의 목표 피험자수는 약 군당 20명으로 잡고 연구할 계획입니다. Pilot study가 끝나고 해당 임상시험 전 임상성적을 토대로 임상시험에 필요한 피험자 수를 산출 하여 추가적으로 연구를 계속 진행할 계획입니다

11. 임상시험 기간

IRB 승인 후 6개월 동안

12. 임상시험 방법(사용량 · 사용방법 · 사용기간 · 병용요법 등을 포함한다)

저자들은 LOR technique을 사용하여 경막외 카테터를 거치시키고 RegionalStim<sup>®</sup> 을 이용하여 전기적 자극을 통해 경막외공간에 카테터가 제대로 위치해 있는지 확인해보려고 합니다.

경막외 카테터 거치 및 전기자극, 자극발생 여부 확인은 다음 순서로 한다.

- ① 환자를 측와위로 눕히고 L3/4 사이를 천자부위로 정한다.
- ② 천자부위를 중심으로 시술이 이루어지는 부위를 antiseptic skin preparation 한다.
- ③ 천자부위에 국소마취제를 사용해 피부마취를 시행한 후 경막외 천자바늘을 척추체에 따라 midline approach를 이용하여 경막외 공간에 접근한다. 경막외 공간에 도달할 때까지 LOR technique을 시행하고, 경막외 공간에 도달 여부는 저항 소실 양상으로 확인한다.
- ④ 경막외 공간에 도달하면 RegionalStim 카테터를 삽입한다.
- ⑤ RegionalStim 카테터를 위쪽으로 5cm 올려 위치시킨다
- ⑥ 원하는 위치에 RegionalStim 카테터가 거치되면 전기자극기와 내장된 가이드와이어를 커넥터를 통해 연결한 후 낮은 자극에서 시작하여 환자가 자극을 느끼기 시작하는 자극 강도까지 올린다. 이때 최초로 자극이 느껴지는 자극의 강도를 기록하고, 자극을 느끼는 부위를 상세히 확인하여 기술한다. 이를 통해 적절한 자극의 위치를 확인한다.
- ⑦ 모든 환자는 경막외 마취를 시행한다. 적절한 국소마취제의 농도 및 용량을 투입하고 10분 뒤 motor, sensory block 여부 및 강도를 확인하고 분만 가능할 정도의 마취에 도달하면 분만을 진행한다.

13. 관찰항목, 임상검사항목 및 관찰검사방법

1) Primary endpoint

기존 LOR technique 방법과 RegionalStim<sup>®</sup>을 통한 방법에서의 경막외 마취 성공률 및 합병증

2) Secondary endpoint

경막외 마취 후 sensory, motor block 여부 및 강도, 마취의 적절성

경막외 마취를 시행하는데 걸린 시간, 시술 용이성

경막외 마취를 시행하는데 걸린 시간, 환자 및 시술의사의 만족도

14. 예측되는 부작용 및 사용 시 주의사항

기존 시행되던 경막외 마취로 생길 수 있는 부작용들 외에는 크게 없다(아래 기술하기로 함).

1) 경막외 마취 도중에 생길 수 있는 부작용은 소독액, 국소마취제 등으로 인한 알레르기 반응이 일어날 수 있습니다. 아주 드물게 시술 중 국소마취제 등의 약제가 의도하지 않게 혈관으로 유입될 수 있으며, 이 경우 신경독성 반응(현기증, 구토, 경련 등), 신경손상, 신경마비 등의 증상이 발생할 수 있습니다. 또한 의도하지 않게 경막천자가 일어날 수 있으며 이 경우 두통이 생길 수 있는데 증상이 심할 경우 경막외 혈액봉합술이 필요할 수도 있습니다.

2) 경막외 마취 이후 생길 수 있는 부작용은 드물지만 주사부위 경막외 출혈로 신경 주변에 혈종이 생기거나, 혹은 감염 발생할 경우 신경을 압박하거나 자극할 수 있으며 이 경우 이상감각, 신경손상, 신경마비 등의 증상이 일어날 수 있습니다. 증상이 아주 심한 경우 외과적인 치료가 필요할 수도 있습니다.

15. 연구 중지 및 탈락기준

1) 피험자가 임상시험 참여동의를 철회한 경우

2) 심각한 이상반응이나 갑작스러운 사고로 인하여 시험을 계속할 수 없는 경우

- 3) 피험자가 계획서에 명시된 방문 및 절차를 준수하지 않으려 하거나 할 수 없는 경우
- 4) 중증의 합병증의 발현으로 시험지속이 곤란한 경우
- 5) 선정기준에 적합하지 않은 피험자가 시험에 참여한 경우
- 6) 제외기준에 해당되는 피험자가 시험에 참여한 경우
- 7) 기타, 시험을 계속하는데 지장을 준다고 임상시험 담당자가 판단한 경우

## 16. 유효성의 평가기준, 평가방법 및 해석방법(통계분석방법)

1) 일차 유효성 평가변수, 이차 유효성 평가변수

### ① 일차 유효성 평가변수

; 기존 LOR technique 방법과 전기자극을 통한 방법에서의 경막외 마취 성공률 및 실패율

① 이차 유효성 평가변수

; 경막외 마취 후 sensory, motor block 여부 및 강도, 마취의 적절성

경막외 마취를 시행하는데 걸린 시간, 시술 용이성

경막외 마취를 시행하는데 걸린 시간, 환자 및 시술의사의 만족도

## 2) 유효성 평가방법 및 해석방법

현재의 LOR 방법으로만 시행한 경막외 카테터 거치 시 그 정확성을 확인할 수 있는 방법이 제한되어 있어서 본 연구에서는 RegionalStim<sup>®</sup> 을 이용한 전기자극을 통해 경막외 공간을 확인하고 이를 기존 LOR 방법과 비교하고자 합니다. 일차 유효성 평가변수는 기존 LOR 방법과 전기자극을 통해 경막외 공간을 확인하는 방법 중 어느 것이 더 정확히 경막외 공간을 확인할 수 있는지입니다. 두 방법으로 시행한 경막외 마취의 성공율 및 실패율을 알아보고, 추가적으로 카테터 위치에 따라 마취 강도 및 통증 조절 정도의 차이를 확인하고자 합니다. 카테터 삽입 시 전기자극을 주었을 때 발생한 자극의 위치와 카테터를 통해 경막외 마취를 했을 때 motor, sensory block 위치 및 정도를 비교하고, 분만 중 적절한 마취가 시행되었는지, 추후 분만 후 통증 조절 시 효과에 대해서도 비교하고자 합니다.

## 17. 부작용을 포함한 안전성의 평가기준, 평가방법 및 보고방법

본 연구에서 발생할 수 있는 부작용은 대부분 경막외 마취의 부작용이며, 그 외의 부작용 발생 가능성은 거의 없습니다. 경막외 마취는 무통분만 시 부위마취의 한 방법으로 널리 시행되고 있으며 이미 부작용 발생 시 처치 방법 및 치료에 대해 대비가 되어있는 마취 방법입니다. 발생한 부작용에 대해서는 증례기록지를 통해 기록할 것이며, 심각한 부작용이 발생할 경우 부작용 보고를 시행함은 물론 피해자 치료 및 보상에도 최선을 다할 것입니다.

## 18. 연구일정표

[illegible]

19. 임상시험 후 피험자의 진료에 관한 사항

임상시험 후 환자는 임상시험에 참여하지 않은 일반적인 자연분만 환자와 마찬가지로 분만 후 활력징후 및 부작용에 대한 관찰을 시행할 것이며 추후 통증 관리도 필요하다면 시행할 것입니다.

20. 피험자의 안전보호에 관한 대책

본 연구는 임상시험 윤리심의위원회에서 본 연구의 윤리적, 법적 요건을 충분히 검토하여 승인한 임상시험계획서에 의하여 시행되며, 또한 시험의 전 과정에 걸쳐 임상시험 관리 기준 및 임상연구에서 의사들의 지침인 헬싱키 선언의 근본정신을 준수하게 될 것입니다. 본 연구 도중에 피험자에 인권에 침해가 발생했을 경우 임상시험 윤리심의위원회에 통보될 것입니다.

피험자의 신원을 파악할 수 있는 정보는 연구자에 의해 비밀로 보장될 것이며, 이니셜과 코드화된 피험자식별정보로 연구 자료가 기록될 것이다. 또한 피험자 및 연구정보는 접근 제한된 컴퓨터에 저장될 것이며 피험자의 신상을 보호하기 위해 독립된 공간에서 연구에 대해 설명하고 동의서를 취득할 것이다. 임상시험의 결과가 출판될 경우에도 신상정보는 비밀상태로 유지될 것입니다.

21. 그 밖에 임상시험을 안전하게 과학적으로 실시하기 위하여 필요한 사항

해당사항 없음

22. 참고문헌

1. Davies SJ, Paech MJ, Welch H et al. Maternal experience during epidural or combined spinal-epidural anesthesia for cesarean section: A prospective and randomized trial. *anesth analg* 1997;85:607-613
2. Alahuhta S, Kangas-Saarela T, Hollmen AI, Edstrom HH. Visceral pain during caesarean section under spinal and epidural anesthesia with bupivacaine. *Act anaesthesiologica Scandinavica* 1990;34:95-98
3. Rawal N, Schollin J, Westrom G. Epidural versus spinal combined epidural block for cesarean section. *Act anaesthesiologica Scandinavica* 1988;62:31-66
4. Tsui BC, Tarkkila P, Gupta S, Kearney R. Confirmation of caudal needle placement using nerve stimulation. *Anesthesiology* 1999;91:374-378.
5. Tsui BC, Gupta S, Finucane B. Confirmation of epidural catheter placement using nerve stimulation. *Canadian journal of anaesthesia = Journal canadien d'anesthesie* 1998;45:640-644.

23. 피험자 동의서 및 설명문 양식(별첨)

첨부하였습니다.

24. 피해자 보상에 대한 규약(별첨)

첨부하였습니다.

25. 증례기록서(CRF) 양식(별첨)

첨부하였습니다.
